# Supplementary material
Source: PubMed Central journal article supplement (PMC4994896)

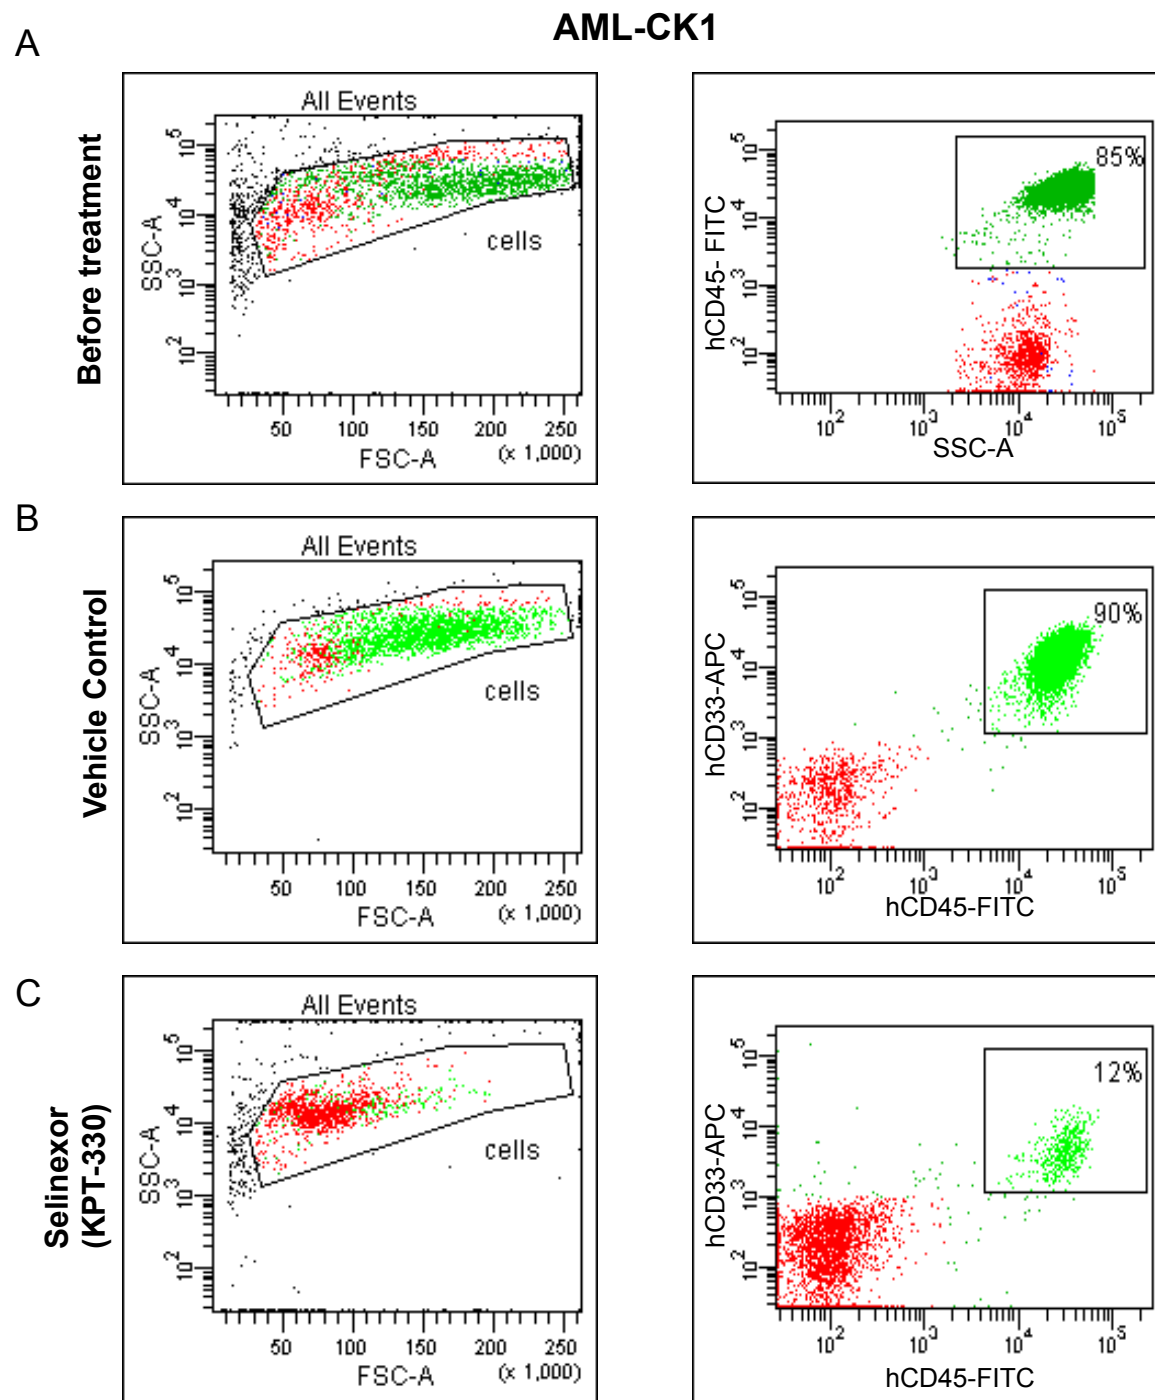

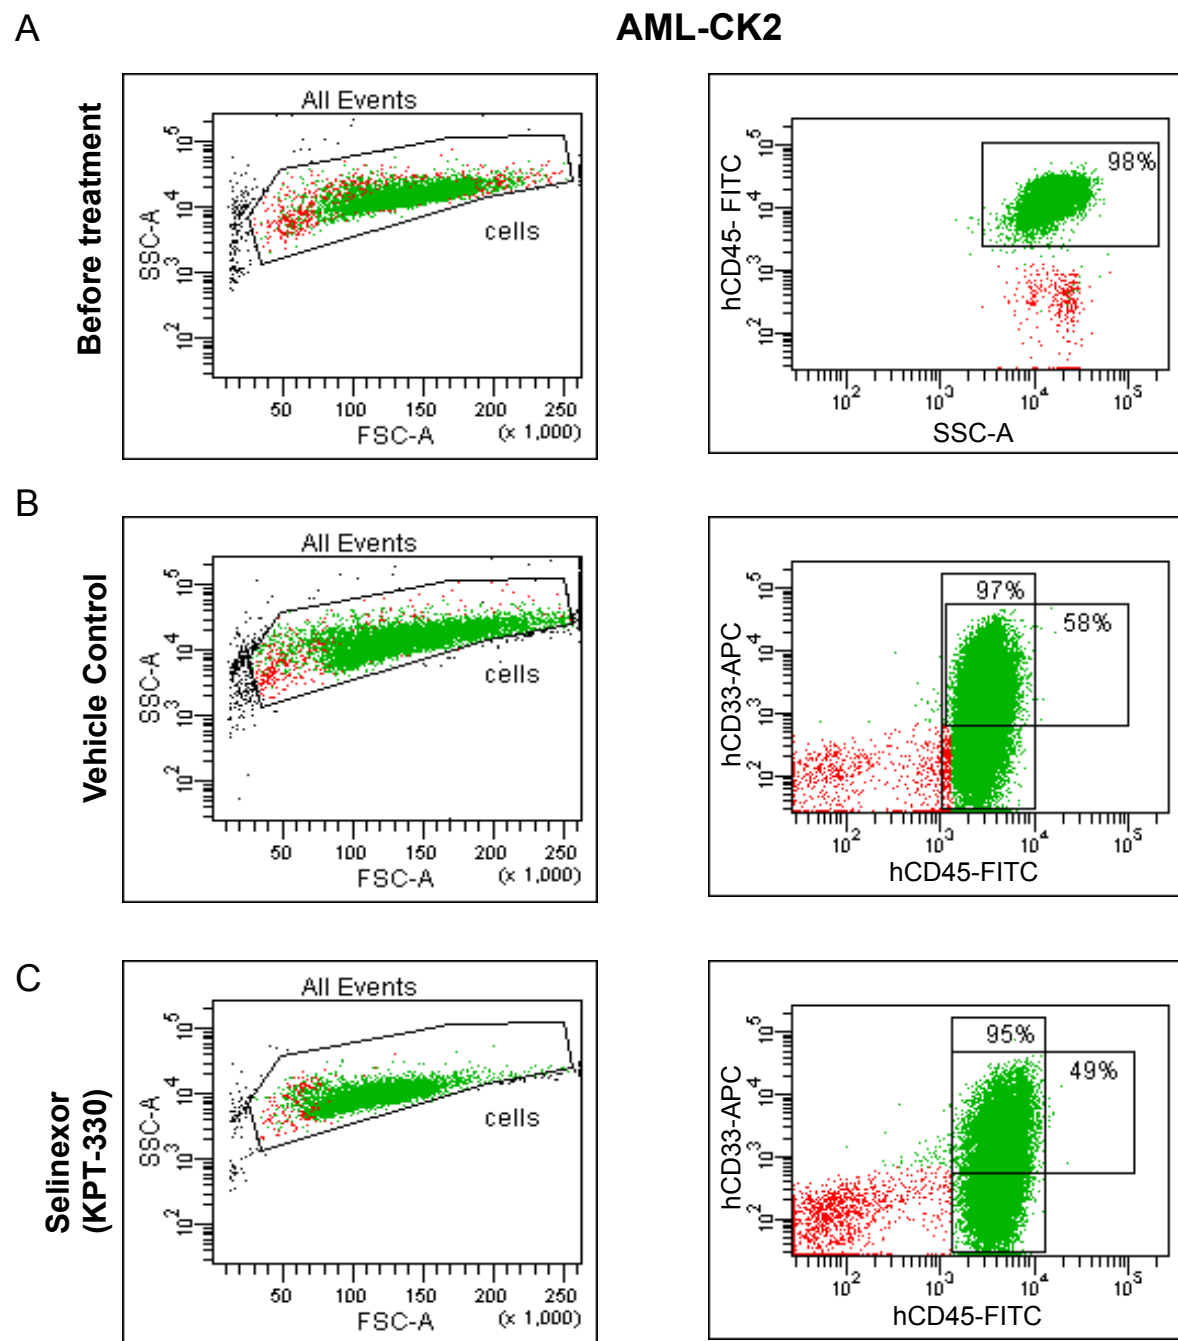

## AML-CN

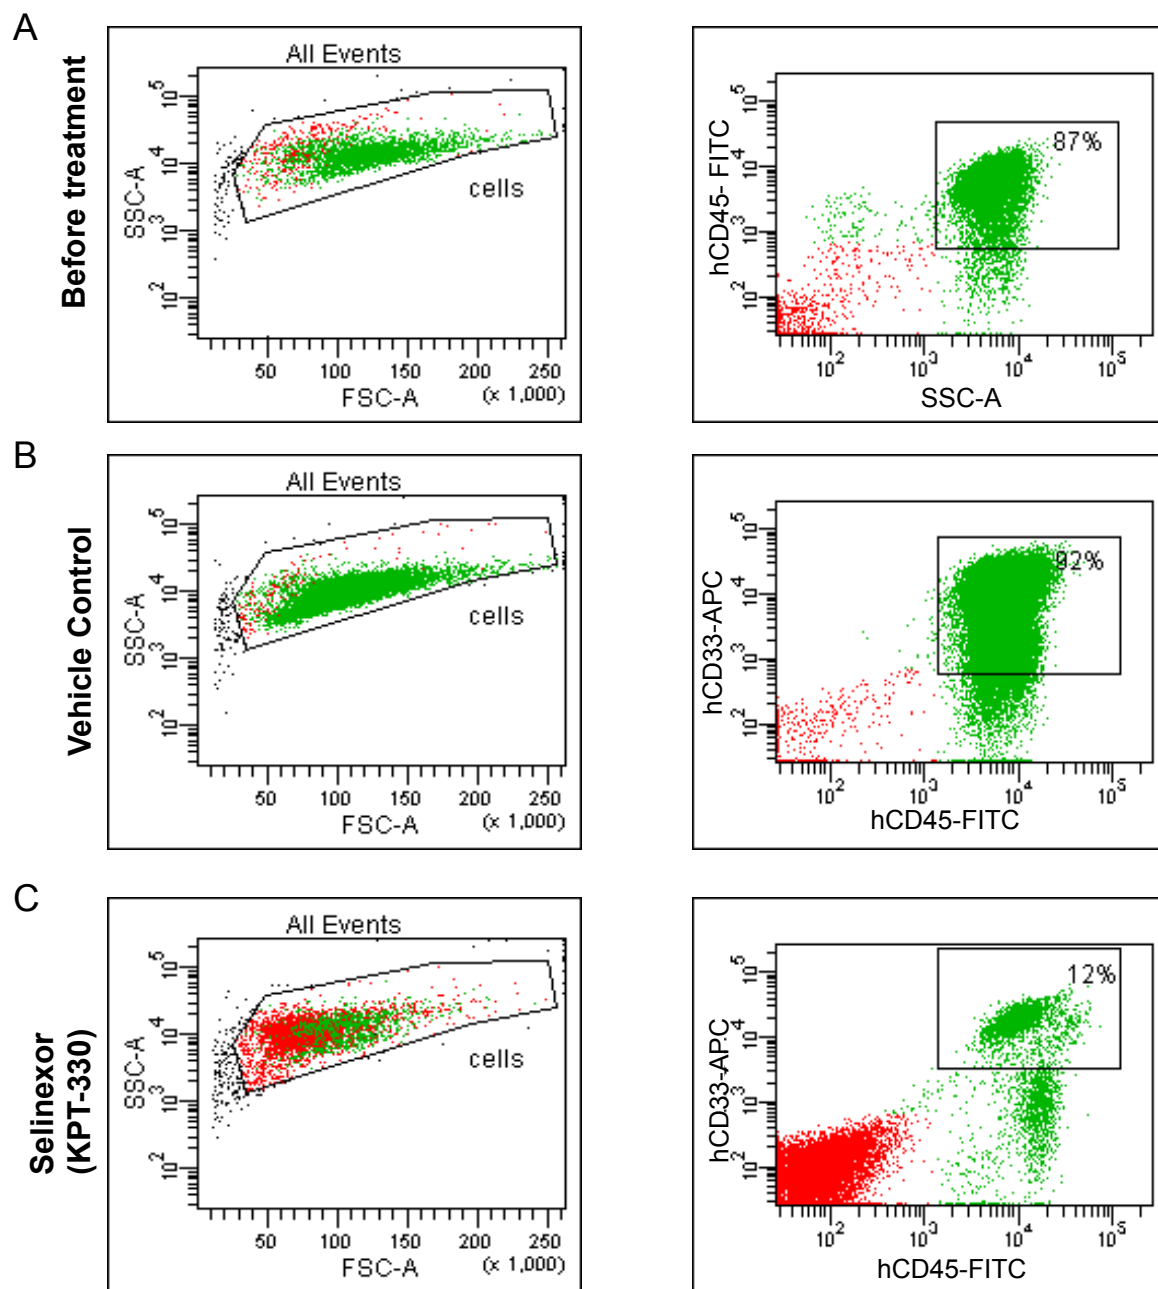

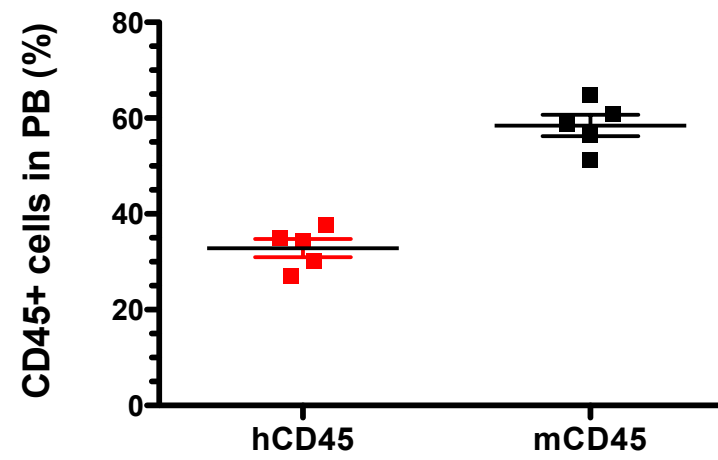

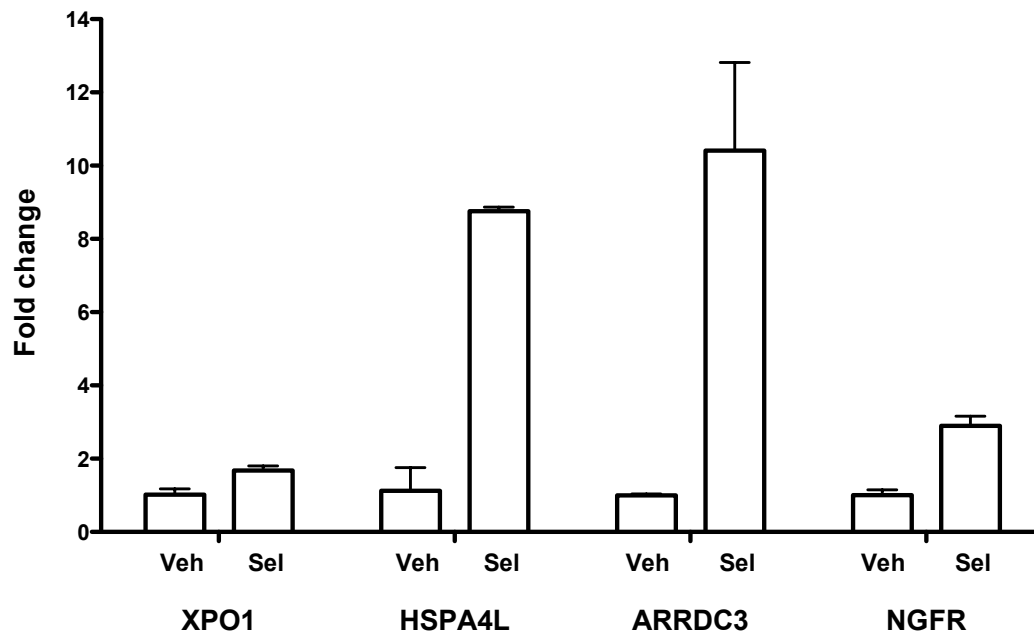

**A****FOXO3A  
Vehicle**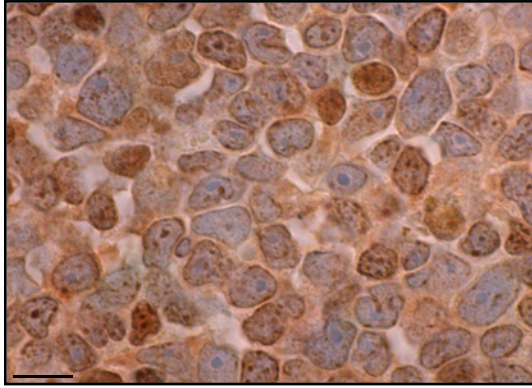**B****FOXO3A  
Selinexor**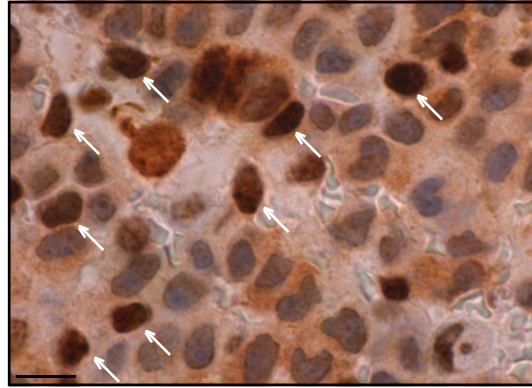

Supplement: NIHMS811276-supplement-Supp_Figures.pdf [file NIHMS811276-supplement-Supp_Figures.pdf]
